# Supplementary material for: The decoupling between genetic structure and metabolic phenotypes in Escherichia coli leads to continuous phenotypic diversity
Source: PubMed Central journal article supplement (PMC3147056; doi:10.1111/j.1420-9101.2011.02287.x), 2011-07

# Supplementary figure

Fig. S1: Diversity of carbon source use by 153 non-*Shigella E. coli* strains.

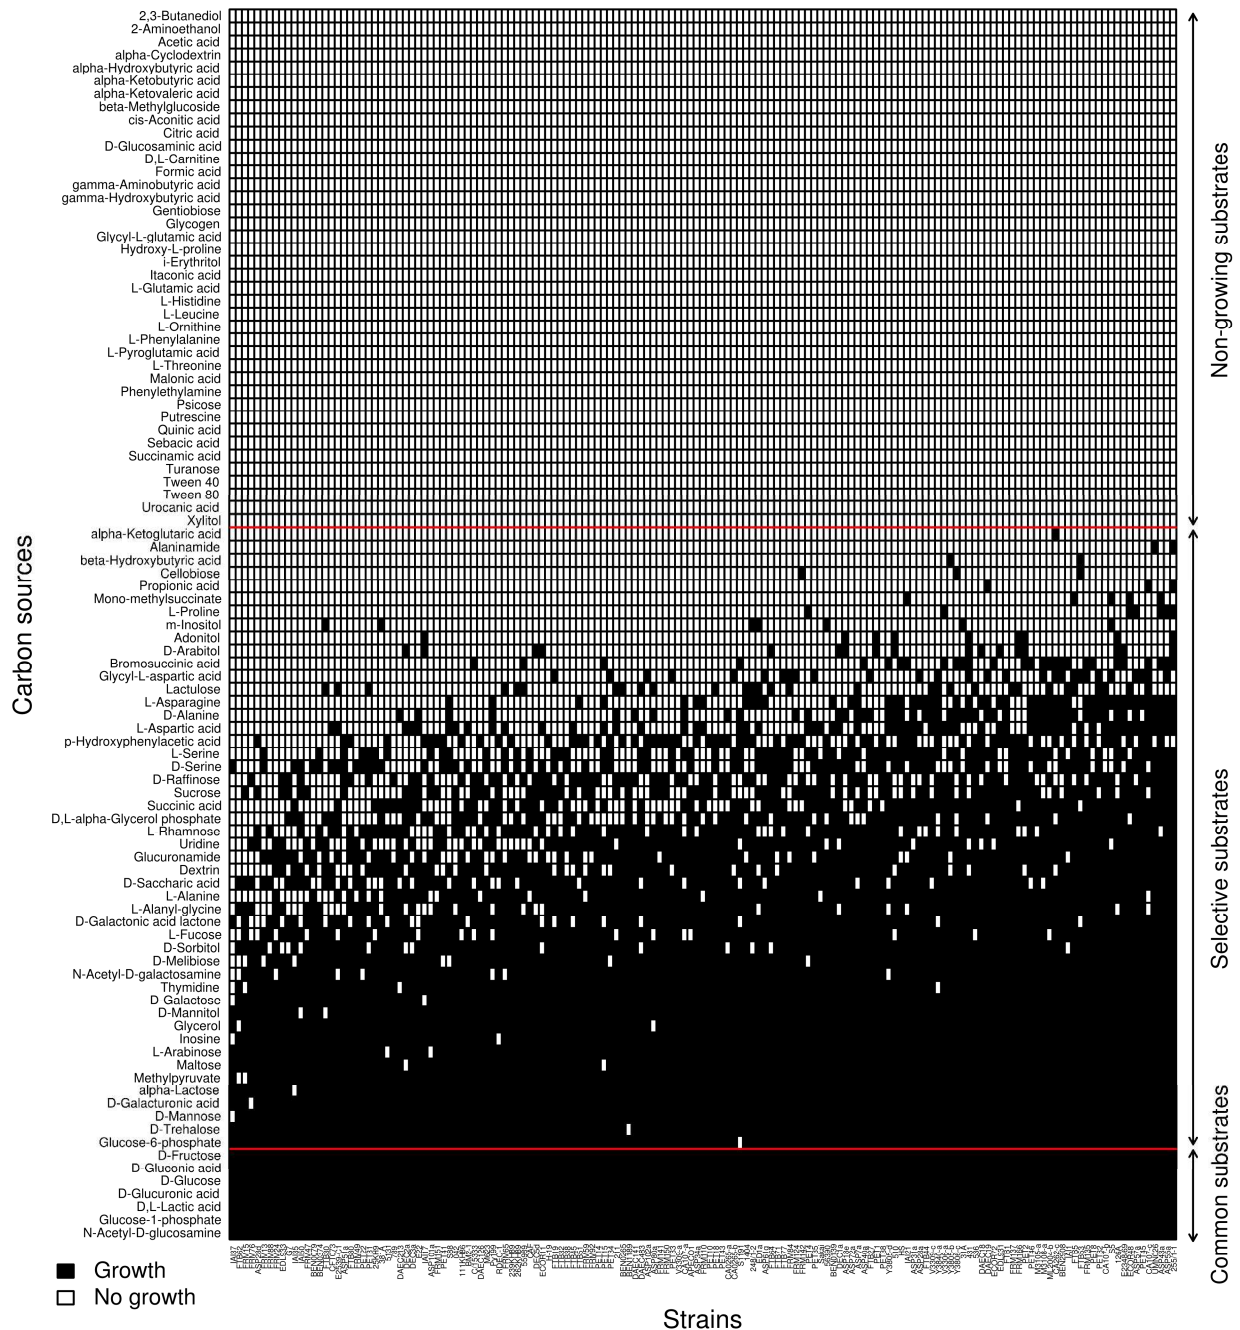

Supplement: jeb0024-1559-SD1.pdf [file jeb0024-1559-SD1.pdf]
