# Supplementary material for: The decoupling between genetic structure and metabolic phenotypes in Escherichia coli leads to continuous phenotypic diversity
Source: PubMed Central journal article supplement (PMC3147056; doi:10.1111/j.1420-9101.2011.02287.x), 2011-07

**Fig. S2: Representation of the three Gaussian distributions that best fit the growth yield data according to the Bayesian information criterion (BIC) applied to Gaussian mixture models.**

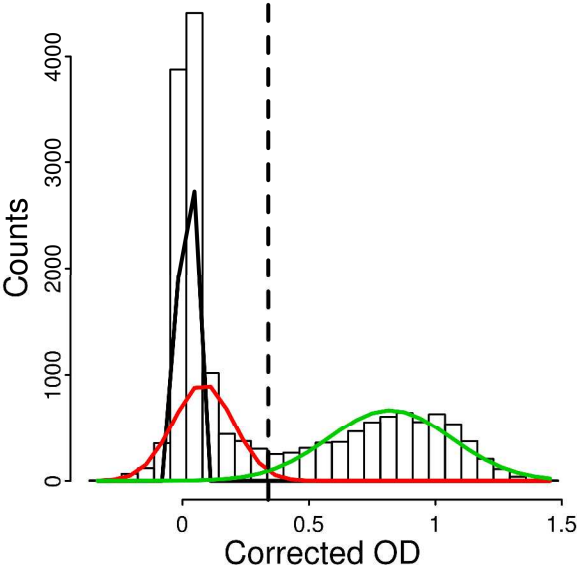

Supplement: jeb0024-1559-SD2.pdf [file jeb0024-1559-SD2.pdf]
